# Supplementary material for: Mitigation of CO poisoning on functionalized Pt–TiN surfaces
Source: Royal Society of Chemistry journal article supplement (doi:10.1039/c3cp53334d), 2013-01-01
Supplement: c3cp53334d.pdf [file c3cp53334d.pdf]

## Mitigation of CO poisoning on functionalized Pt/TiN surfaces

R. Q. Zhang<sup>1,2</sup>, C.-E. Kim<sup>1</sup>, B.-D. Yu<sup>3</sup>, C. Stampfl<sup>4,1</sup>, and A. Soon<sup>1,4\*</sup>

<sup>1</sup>*Department of Materials Science and Engineering, Yonsei University, 120-749, Seoul, Korea*

<sup>2</sup>*School of Chemical Engineering and Bioengineering, Washington State University, 99163, WA*

<sup>3</sup>*Department of Physics, University of Seoul, Seoul 130-743, Korea*

<sup>4</sup>*School of Physics, The University of Sydney, Sydney NSW 2006, Australia*

Table S1. The adsorption energy (with ZPE correction) for different atoms and molecular species adsorbed on the Pt/TiN(100) surface. The positive and negative values correspond to adsorption that is either endothermic or exothermic, respectively.

| Adsorption energy (eV) | $T_{\text{Pt}}$ | $T_{\text{Ti}}$ | $B_{\text{Ti}}$ |
|------------------------|-----------------|-----------------|-----------------|
| CO <sub>2</sub>        | -0.19           | *               | *               |
| CO                     | -1.24           | -0.98           | *               |
| H                      | -0.43           | *               | 0.17            |
| H <sub>2</sub>         | 0.06            | 0.07            | *               |
| OH                     | 0.13            | -0.60           | 0.29            |
| O <sub>2</sub>         | -0.66           | -2.30           | *               |
| O                      | -1.42           | -2.64           | -1.67           |

\* notes that molecules on these sites are unstable (i.e. they do not bind on the surface).

\* Corresponding author. E-mail: aloysius.soon@yonsei.ac.kr
